# Supplementary material for: Nova1 is a master regulator of alternative splicing in pancreatic beta cells
Source: PubMed Central journal article supplement — Nucleic Acids Res. 2014 Sep 23;42(18):11818–30. doi: 10.1093/nar/gku861 (PMC4191425; doi:10.1093/nar/gku861), 2014-09-23
Supplement: supp_gku861_nar-01192-a-2014-File009.pdf [file supp_gku861_nar-01192-a-2014-File009.pdf]

**Table S1.** Sequences of siRNAs used to KD gene/protein expression.

|                                                              | Supplier                   | Sequence                                                             |
|--------------------------------------------------------------|----------------------------|----------------------------------------------------------------------|
| <b>Rat</b>                                                   |                            |                                                                      |
| Allstars Negative Control siRNA                              | Qiagen, Venlo, Netherlands | Not provided                                                         |
| siNova1#1 Stealth Select siRNAi Duplex Oligoribonucleotides  | Invitrogen, Pasley, UK     | 5'-CCGCAGGGCUAAUAGGACAUGCUGCAA-3'<br>5'-UUAGCAUGUCCUAAUAGCCCUGCGG-3' |
| siNova1#2 Stealth Select siRNAi Duplex Oligoribonucleotides  | Invitrogen, Pasley, UK     | 5'-TAGCCAGCTATGGATATAATCTCAA-3'<br>5'-UUGAGAUUAUAUCCAUAAGCUGGCUA-3'  |
| siFoxO3A#1 Stealth Select siRNAi Duplex Oligoribonucleotides | Invitrogen, Pasley, UK     | 5'-ACAGCCGUUUAUGCGGGGUUCAGAA-3'<br>5'-UUCUGAACCCGCAUGAAACGGCUGU-3'   |
| siFoxO3A#2 Stealth Select siRNAi Duplex Oligoribonucleotides | Invitrogen, Pasley, UK     | 5'-GGCAAGAGCUCUUGGUGGAUCAUCA-3'<br>5'-UGAUGAUCCACCAAGAGCUCUUGCC-3'   |
| siBim Stealth Select siRNAi Duplex Oligoribonucleotides      | Invitrogen, Pasley, UK     | 5'-GAGUCAAUGAGACUUACACGAGGA-3'<br>5'-CGAGGAGGGCGUUUGCAAACGAUUA-3'    |
| siSNAP25 b Stealth Select siRNAi Duplex Oligoribonucleotides | Invitrogen, Pasley, UK     | 5'-GAGGAAGGGAUGGACCAAAUCAUA-3'<br>5'-UAUUGAUUUGGUCCAUCCCUUCCUC-3'    |
| <b>Human</b>                                                 |                            |                                                                      |
| siNova1 Stealth Select siRNAi Duplex Oligoribonucleotides    | Invitrogen, Pasley, UK     | 5'-UUUGCAACUGAACAAUUGUCUGUCC-3'<br>5'-GGACAGACAAUUGUUCAGUUGCAAA-3'   |

**Table S2.** Primers used for real time and splicing analyses.

| Primer used for real time analyses |                           |                          |        |
|------------------------------------|---------------------------|--------------------------|--------|
| Name                               | Forward (5'-3')           | Reverse (5'-3')          | Lenght |
| <b>RAT</b>                         |                           |                          |        |
| GAPDH ST                           | ATGACTCTACCCACGGCAAG      | TGTGAGGGAGATGCTCAGTG     | 930 bp |
| GAPDH RT                           | AGTTCAACGGCACAGTCAAG      | TACTCAGCACCAGCATCACC     | 136 bp |
| NOVA1 ST                           | TCTGACCCCATGACCACCTCCA    | CTGCTGGGAAGGCCGCAACA     | 421 bp |
| NOVA1 RT                           | GGAGCAGTCAGGGGCTTGGG      | TGAGACAGCTGCCACTCTGTGGA  | 161 bp |
| FOXO1ST                            | AGGCTAGGAGTTAGTGAGCAGGCAA | AACCTGTGGGTGCTGGGCAA     | 200 bp |
| FOXO1RT                            | GGCTAGGAGTTAGTGAGCAGGCAAC | GGGTGAAGGGCATCTTTGGACTGC | 91 bp  |
| SNAP25ART                          | CAACTCGATCGTGTGCAAGA      | ATTATTGCCCCAGGCTTTTT     | 159 bp |
| SNAP25BRT                          | GAAAATTCTGCGGGCTTTGT      | ATTATTGCCCCAGGCTTTTT     | 80 bp  |
| <b>HUMAN</b>                       |                           |                          |        |
| ACTB ST                            | AAATCTGGCACCACACCTTC      | CCGATCCACACGGAGTACTT     | 805 bp |
| ACTB RT                            | CTGTACGCCAACACAGTGCT      | GCTCAGGAGGAGCAATGATC     | 127 bp |
| NOVA1 ST                           | TGCAGCTGCTCCTCAGCCCT      | ACTGGCCGTCTTCGCCCCTA     | 363 bp |
| NOVA1 RT                           | CCGGTAGCAGCGGCAGGAAC      | AGCGGCCTTTTCCGCGAGTC     | 116 bp |
| Primers used for splicing analysis |                           |                          |        |
| Name                               | Forward (5'-3')           | Reverse (5'-3')          |        |
| <b>RAT</b>                         |                           |                          |        |
| GABRG2                             | AGCCCCGGAAGTCTCTGCCCA     | CCCGTGTCTCCAGGCTCCTGT    |        |
| NOVAEX4                            | TGCCCCAAAATGTTGCCAAGACA   | AGCCTTCACAGTAGCACCTCCCT  |        |
| NEUREXIN                           | CACGAGCAGACAGGCTGGCC      | CTGGCCCTGCTCTTTCCCGC     |        |
| PAX6EX11                           | TCACATCCCTATCAGCAGCA      | TGGGCTGACTGTTTCATGTGT    |        |
| SNAP25-A                           | AACAACCTCGATCGTGTGCAAG    | CATCTGCTCCCCTTCATCC      |        |
| SNAP25-B                           | TGACGGACCTAGGAAAATTCTG    | CATCTGCTCCCCTTCATCC      |        |
| INSR                               | TGCACAACGTGGTTTTTGT       | TCTCTTCTGGGGAGTCTGA      |        |
| MAPK9                              | TGAGTGACAGTAAAAGCGATGG    | GTTTGGTTCTGAAAAGGACGAC   |        |
| ANK3                               | TGCCATCACAGGGGACACTGAC    | GACCTATCCGAACTGAAGGAGCG  |        |
| CACNA1C1                           | AGTGATCCCTGGAATGTTTTG     | AGGACTTGATGAAGGTCCACAG   |        |
| CACNA1C2                           | GATATAGCAATCACCGAGGTACAC  | AGGACTTGATGAAGGTCCACAG   |        |
| ARHGEF12                           | CCGAGAGTCACCAACAGATAAG    | TTGTACGAAGACTGGATTGTCC   |        |
| CYB5R4                             | CTGCCTCCAAGTACTCACCTTC    | GACTGGACATGTGAGACAAAGC   |        |
| SFRS9                              | GGACCTCGAGGACTTGTCTAC     | GGAAATCTGACCGTCTTGTAGG   |        |
| MAP3K9                             | AGCTCAGTTGTTCCAAAAGAGG    | TATCTCCATAAGGCTGGTGAAC   |        |
| CLASP1                             | TGACCTCACCCACCAACTGTTC    | TGGCTTCTGTAAGTCCACGCAAAG |        |
| NUMB                               | GGGATTTCTGCTCTTAGCC       | GAGAGGCAGCACCAGAAGAC     |        |
| KCNMA1                             | TCACACCTCCTGGAATGGACAG    | GGTCATCATCATCGTCTTGGTC   |        |

ST denotes standard PCR, RT denotes real time qPCR.

**Table S3.** Reads count and mapping statistics after RNA-seq.

| Sample | Condition     | Reads 1     | Reads 2     | Total reads<br>1+2 | Mapped<br>reads | Mapped<br>total | Properly<br>paired | %<br>mapped |
|--------|---------------|-------------|-------------|--------------------|-----------------|-----------------|--------------------|-------------|
| 1      | CTL 1         | 153.174.762 | 153.174.762 | 306.349.524        | 260.657.490     | 355.836.052     | 302.888.416        | 85%         |
| 2      | Noval KD<br>1 | 68.685.321  | 68.685.321  | 137.370.642        | 116.197.690     | 159.271.991     | 135.962.398        | 85%         |
| 3      | CTL 2         | 67.568.538  | 67.568.538  | 135.137.076        | 106.831.580     | 162.088.157     | 125.538.492        | 79%         |
| 4      | Noval KD<br>2 | 53.447.414  | 53.447.414  | 106.894.828        | 81.799.358      | 126.311.494     | 95.700.154         | 77%         |
| 5      | CTL 3         | 109.127.969 | 109.127.969 | 218.255.938        | 179.430.848     | 260.732.788     | 209.394.344        | 82%         |
| 6      | Noval KD<br>3 | 79.355.128  | 79.355.128  | 158.710.256        | 130.637.368     | 185.478.101     | 149.657.890        | 82%         |

# SUPPLEMENTARY FIGURE 1

**A**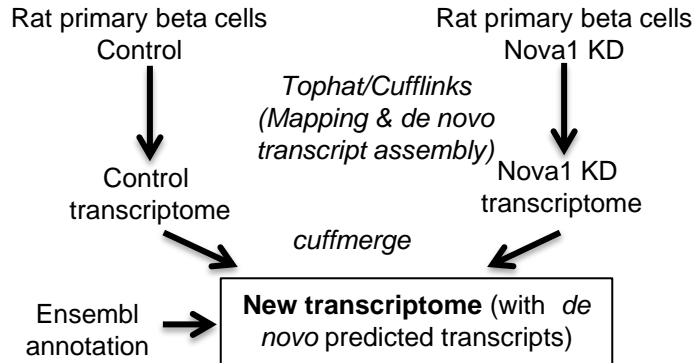**B**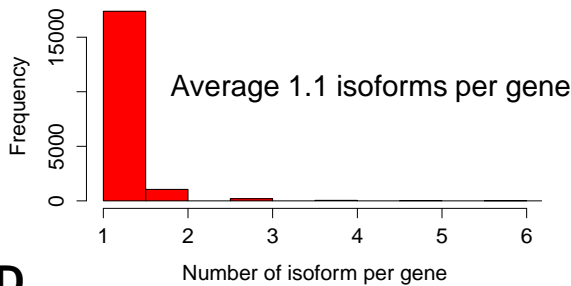**C**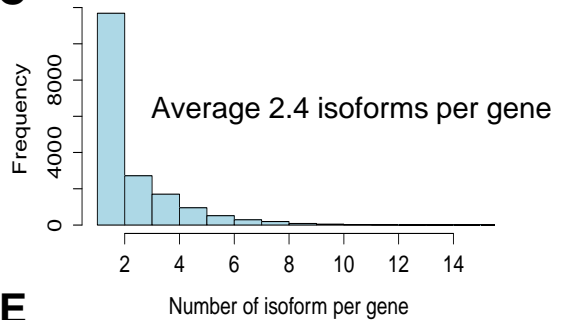**D**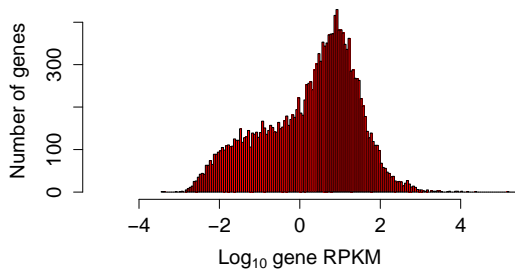**E**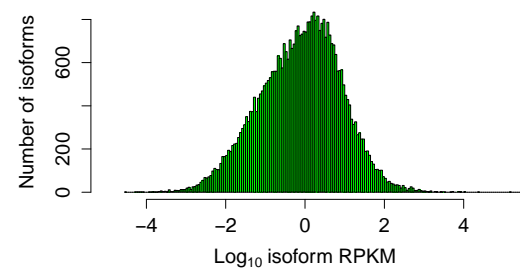**F**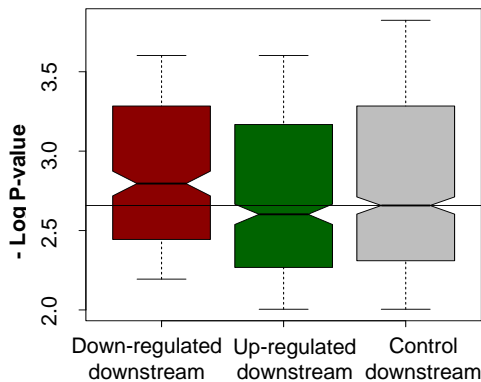**G**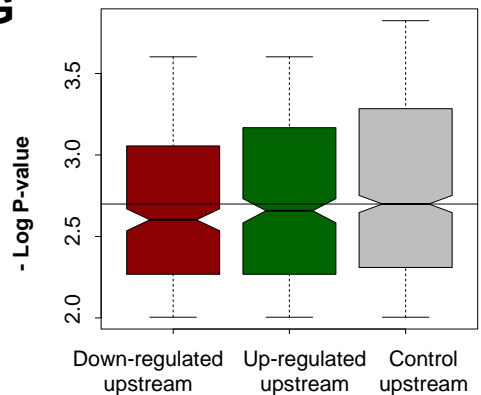

## SUPPLEMENTARY FIGURE 2

### A

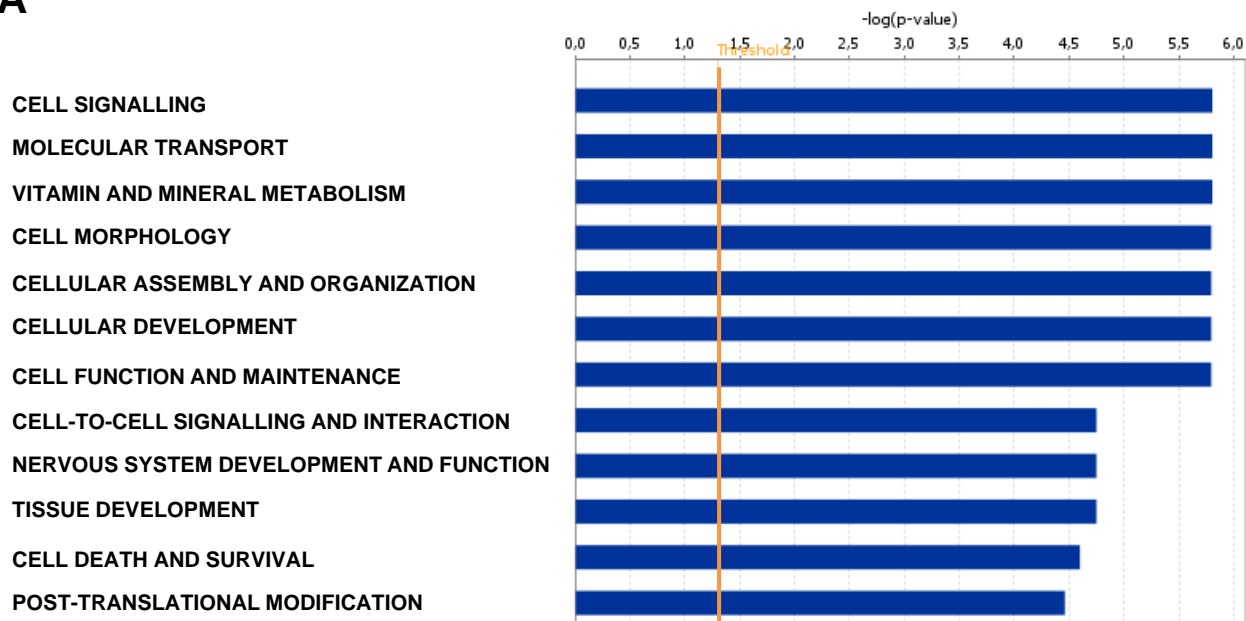

### B

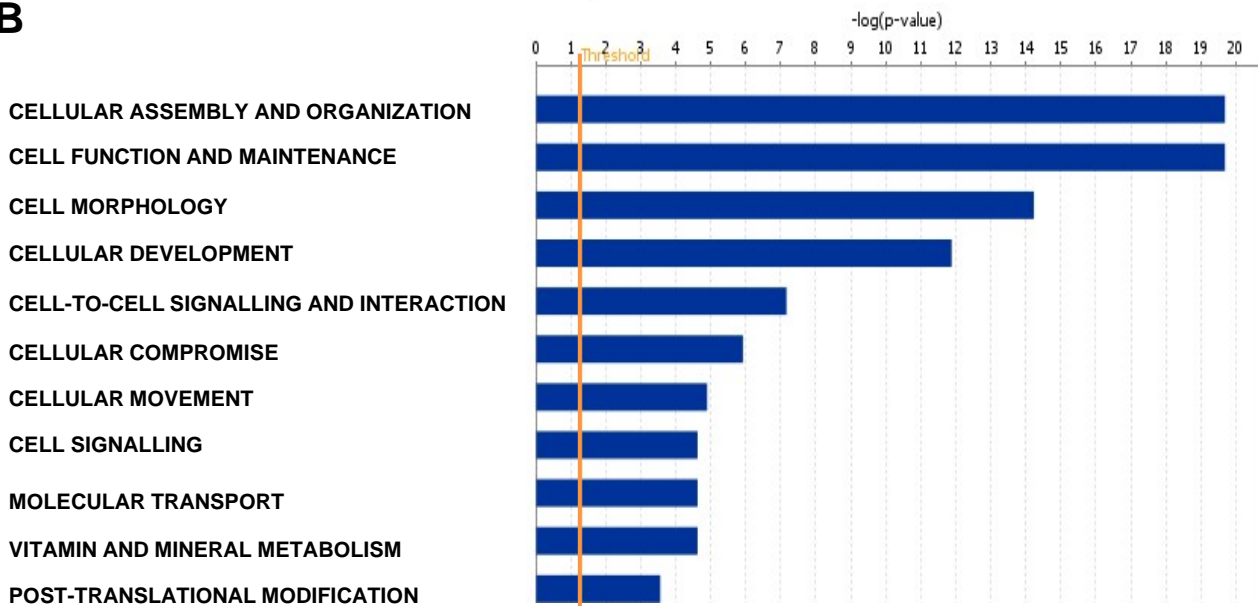

# SUPPLEMENTARY FIGURE 3

## ARHGEF12

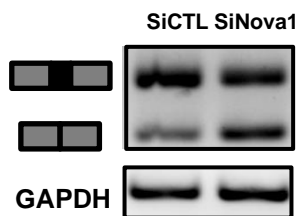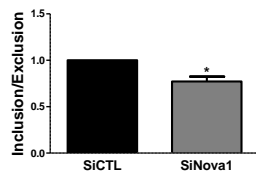

## KCNMA1

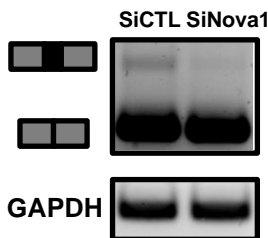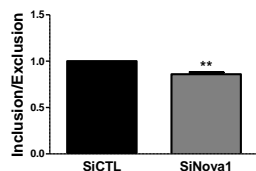

## MAPK9

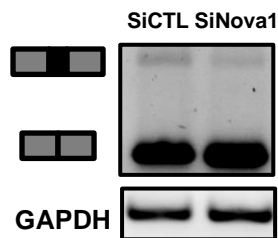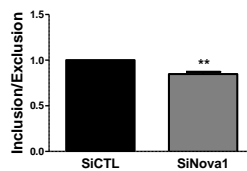

## SFRS9

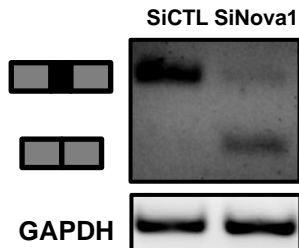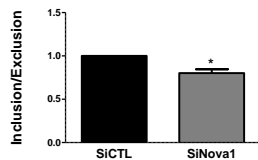

## MAP3K9

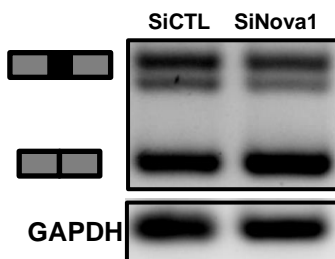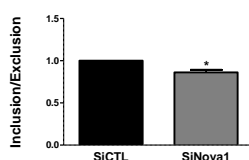

## NUMB

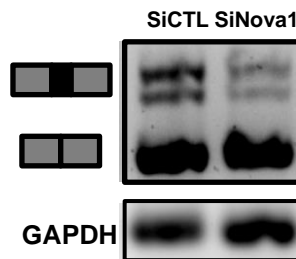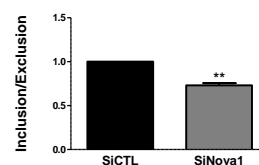

## ANK3

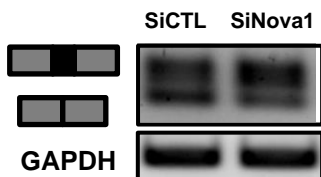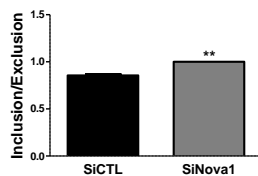

## CYB5R4

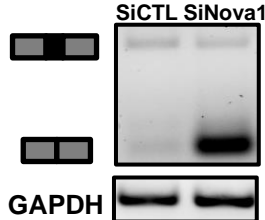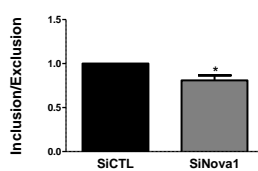

## CLASP1

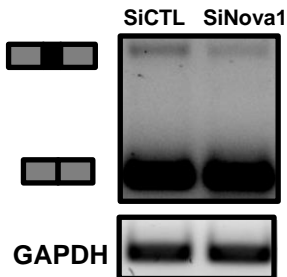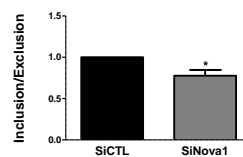

# SUPPLEMENTARY FIGURE 4

## A

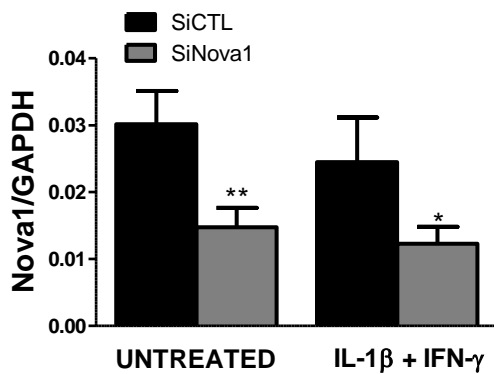

## B

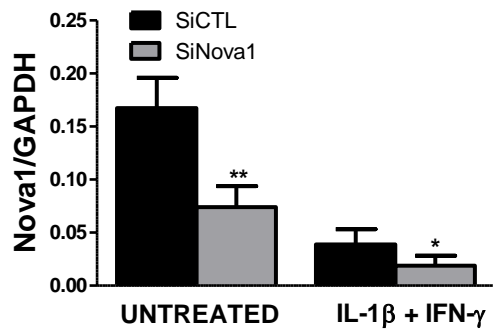

## C

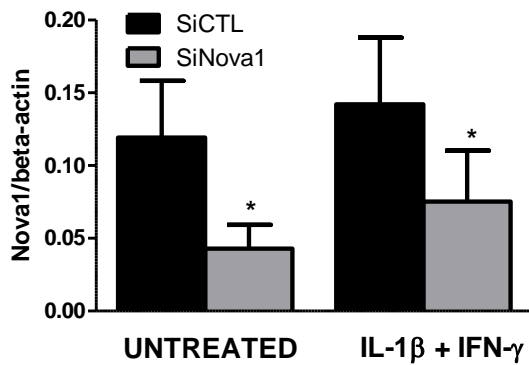

# SUPPLEMENTARY FIGURE 5

## A

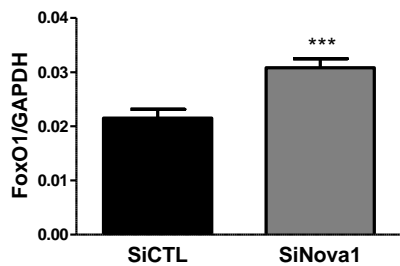

## B

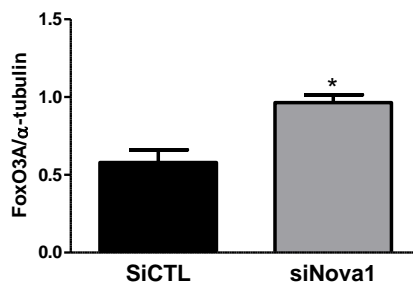

## C

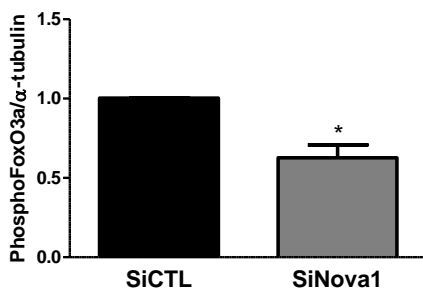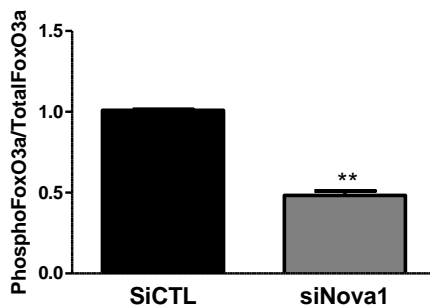

## D

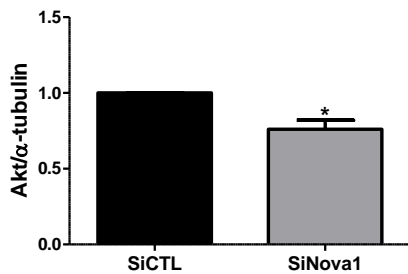



**Table S3. Reads count and mapping statistics after RNA-seq.** Summary of the read counts after sequencing and mapping of three FACS-purified primary rat beta cell preparations cultured under control condition (CTL 1,2,3) or after *Novo1* KD (*Novo1* KD 1,2,3). An average of 177 million total reads per sample was obtained and 82% of them were properly mapped using Tophat. The mappings were subsequently analyzed with Cufflinks for the discovery of unknown expressed isoforms. The numbers in the column “mapped total” is greater than that in “mapped reads” column since some reads were mapped to more than one alternative location.

**Figure S1. De novo transcript assembly of the RNA-seq data and analysis of YCAY clusters.**

A. Description of the strategy used for the *de novo* isoforms assembly using the RNA-seq samples and a Tophat/Cufflinks pipeline. B-C. Distribution of isoforms per gene as annotated in Ensembl version 70 (B) and after *de novo* assembly with discovery of unknown isoforms (C). *De novo* discovery of expressed but unknown isoforms increased the number of identified isoforms per genes (2.4 versus 1.1 with Ensembl annotation only). D-E. Histograms of RPKM levels of the rat genes in beta cell (D) and the *de novo* assembled isoforms (E). F-G. Distributions of the P-values of predicted clusters of *Novo1* YCAY motifs in downstream (F) and upstream (G) regions. Compared to random control, downstream regions (where *Nova* acts as activator) of down-regulated exons after *Novo1* KD showed more significant YCAY motifs clusters (F, red box, Wilcoxon-Mann-Wittney P-value: 0.002). In contrast, the downstream junctions regions of up-regulated exons after *Novo1* KD showed less significant YCAY clusters (F, green box, Wilcoxon-Mann-Wittney P-value: 0.036) as the upstream regions of down-regulated genes showed (G, red box, Wilcoxon-Mann-Wittney P-value: 0.027). There were no differences in significant YCAY motifs clusters in the upstream regions of up-regulated exons compared to random control (G, green box).

**Figure S2. Ingenuity Pathway Analysis of *Novo1* KD- differentially spliced transcripts.**

The length of the blue bars indicates the significance of the association between the set of genes and the keyword, and is expressed as minus the logarithm of the probability that a random set of genes from the human genome would be associated with the same keyword. The straight orange line indicates a threshold of 0.05 (corresponding to a  $-\log(\text{B-H p-value})$  of 1.3). A. IPA analysis of all transcripts modified by *Novo1* in pancreatic beta cells. B. IPA analysis of transcripts modified by *Novo1* and shared by brain and pancreatic beta cells.

**Figure S3. RT-PCR validation of *Novo1* target exons in INS-1E cells.**

Each panel shows a predicted *Novo1* target alternative splicing event. The alternative exon(s) with *Novo1*-regulated inclusion or exclusion are highlighted in black or white at the left side of the figures. The result of RT-PCR analysis comparing siCTL and si*Novo1* is shown at the right side. Each agarose gel is representative of three independent experiments. The respective quantification of inclusion/exclusion of each exon (done as described in Figure 1) is shown in the figure below the picture of the gel. \*  $P < 0.05$  or \*\*  $P < 0.01$  vs. siCTL by paired *t*-test.

**Figure S4. Confirmation of *Novo1* KD.**

INS-1E cells, primary rat beta cells and human islet cells were transfected with siCTL and si*Novo1* and then exposed or not to cytokines. After 24 h or 48h cells were used for qRT-PCR analyses and apoptosis was measured in parallel (data shown in Figure 4). Confirmation of *Novo1* KD in INS-1E cells (A), rat primary beta cells (B) and human islet cells (C). Results are mean  $\pm$  SEM (n=4) \*  $P < 0.05$  or \*\*  $P < 0.01$  vs. siCTL untreated or after cytokine treatment by paired *t*-test.

**Figure S5. *Novo1* regulates the expression of the *FoxO* family of transcription factors and the *Akt* kinase.**

INS-1E cells were transfected with siCTL or si*Novo1* and collected after 48h for mRNA analysis. A. Expression of the transcription factor *FoxO1* after *Novo1* KD measured by

qRT-PCR. Results are mean  $\pm$  SEM (n=4). \*\*\*  $P < 0.001$  vs. siCTL. B. and C. Densitometry analysis of the Western blots shown in Figure 7 for B. FoxO3A and C. PhosphoFoxO3A using respectively  $\alpha$ -tubulin or total FoxO3A to correct for protein loading. Results are mean  $\pm$  SEM (n=5). \*  $P < 0.05$  or \*\*  $P < 0.01$  vs. siCTL by paired  $t$ -test. D. Densitometry analysis of the Western blot shown in Figure 7E for Akt. Results are mean  $\pm$  SEM (n=4). \*  $P < 0.05$  vs. siCTL by paired  $t$ -test
